# Supplementary material for: Dynamic evolution of emphysema and airway remodeling in two mouse models of COPD
Source: Springer Nature journal article supplement (doi:10.1186/s12890-021-01456-z), 2021-04-26
Supplement: MOESM1 [file 19106644]

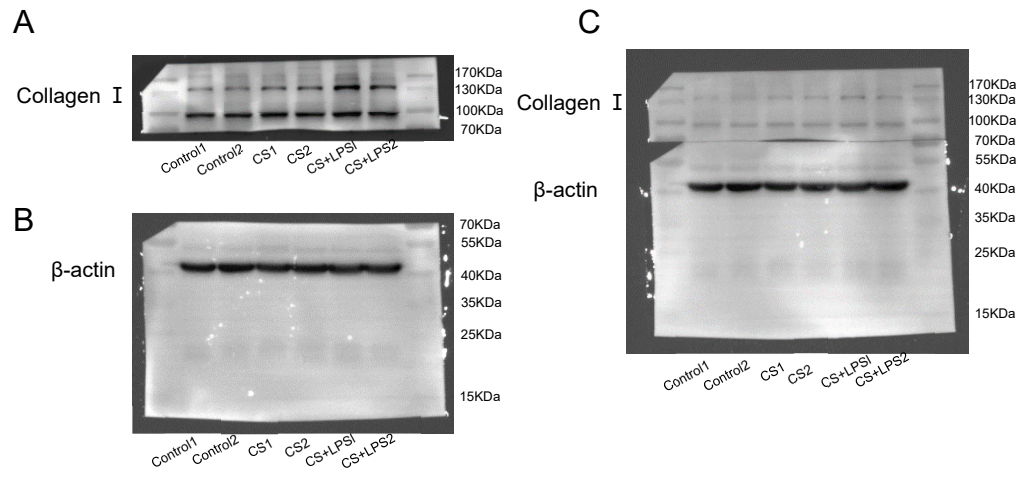

Supplementary Figure 1
